# Supplementary material for: Cerebral microbleeds and stroke risk after ischaemic stroke or transient ischaemic attack: a pooled analysis of individual patient data from cohort studies
Source: PubMed Central journal article supplement (PMC6562236; doi:10.1016/s1474-4422(19)30197-8), 2019-07
Supplement: mmc1.pdf [file mmc1.pdf]

# THE LANCET Neurology

## Supplementary appendix

This appendix formed part of the original submission and has been peer reviewed.  
We post it as supplied by the authors.

Supplement to: Wilson D, Ambler G, Lee K-J, et al. Cerebral microbleeds and stroke risk after ischaemic stroke or transient ischaemic attack: a pooled analysis of individual patient data from cohort studies. *Lancet Neurol* 2019; published online May 23. [http://dx.doi.org/10.1016/S1474-4422\(19\)30197-8](http://dx.doi.org/10.1016/S1474-4422(19)30197-8).

**Cerebral microbleeds and stroke risk after ischaemic stroke or transient ischaemic attack: a pooled analysis of individual patient data from cohort studies**

Online appendix

**Table of Contents**

|         |                                                                                                                                                                                                                             |
|---------|-----------------------------------------------------------------------------------------------------------------------------------------------------------------------------------------------------------------------------|
| Page 3  | List of collaborators                                                                                                                                                                                                       |
| Page 4  | Table 1: Risk of bias table for the included cohorts                                                                                                                                                                        |
| Page 6  | Table 2: Baseline characteristics of patients with and without cerebral microbleeds (CMBs)                                                                                                                                  |
| Page 7  | Table 3: Baseline characteristics of patients with and without any composite event (intracranial haemorrhage or ischaemic stroke) during follow-up                                                                          |
| Page 8  | Table 4: Baseline characteristics of patients with and without intracranial haemorrhage during follow-up                                                                                                                    |
| Page 9  | Table 5: Baseline characteristics of patients with and without ischaemic stroke during follow-up                                                                                                                            |
| Page 10 | Figure 1: Kaplan Meier curves for CMB distributions and outcomes: A) Composite outcome; B) Intracranial haemorrhage; C) Ischaemic stroke                                                                                    |
| Page 13 | Figure 2: Kaplan Meier curves for CMB presence and burden in (A) Patients treated with oral anticoagulants (with or without antiplatelet drugs) (n=7,737); and (B) Patients treated with antiplatelet drugs only (n=11,520) |
| Page 15 | Figure 3: Forest plots for each outcome for all cohorts                                                                                                                                                                     |
| Page 16 | Table 6: Rates and adjusted Hazard Ratios (aHRs) for outcome events according to baseline CMBs in patients treated with antiplatelets only                                                                                  |
| Page 17 | Secondary outcomes and sensitivity analyses                                                                                                                                                                                 |
| Page 19 | Table 7: Baseline characteristics of patients according to whether they received treatment with antithrombotic drugs (antiplatelet drugs or oral anticoagulants)                                                            |

**List of collaborators**

**CROMIS-2:** Kirsty Harkness, Louise Shaw, Jane Sword, Azlisham Mohd Nor, Pankaj Sharma, Deborah Kelly, Frances Harrington, Marc Randall, Matthew Smith, Karim Mahawish, Abduelbaset Elmarim, Bernard Esisi, Claire Cullen, Arumug Nallasivam, Christopher Price, Adrian Barry, Christine Roffe, John Coyle, Ahamad Hassan, Jonathan Birns, David Cohen, L Sekaran, Adrian Parry-Jones, Anthea Parry, David Hargroves, Harald Proschel, Prabel Datta, Khaled Darawil, Aravindakshan Manoj, Mathew Burn, Chris Patterson, Elio Giallombardo, Nigel Smyth, Syed Mansoor, Ijaz Anwar, Rachel Marsh, Sissi Ispoglou, Dinesh Chadha, Mathuri Prabhakaran, Sanjeevikumar Meenakishundaram, Janice O'Connell, Jon Scott, Vinodh Krishnamurthy, Prasanna Aghoram, Michael McCormick, Nikola Sprigg, Paul O'Mahony, Martin Cooper, Lillian Choy, Peter Wilkinson, Simon Leach, Sarah Caine, Ilse Burger, Gunaratam Gunathilagan, Paul Guylar, Hedley Emsley, Michelle Davis, Dulka Manawadu, Kath Pasco, Maam Mamun, Robert Luder, Mahmud Sajid, Ijaz Anwar, James Okwera, Elizabeth Warburton, Kari Saastamoinen, Timothy England, Janet Putterill, Enrico Flossman, Michael Power, Krishna Dani, David Mangion, Appu Suman, John Corrigan, Enas Lawrence, Djamil Vahidassr, Clare Shakeshaft, Martin M Brown, Andreas Charidimou, Hannah Cohen, Gargi Banerjee, Henry Houlden, Mark J White, Tarek A Yousry, Kirsty Harkness, Enrico Flossmann, Nigel Smyth, Louise J Shaw, Elizabeth Warburton, Keith W Muir. **Bern:** Marwan El-Koussy, Pascal Gratz. **TABASCO:** Jeremy Molad, Amos D Korczyn, Efrat Kliper. **PERFORM- MRI:** Philippe Maeder, Achim Gass, Chahin Pachai, Luc Bracoub, Marie-Yvonne Douste-Blazy, Marie Dominique Fratacci, Eric Vicaut. **SAMURAI NVAF:** Shoichiro Sato, Kaori Miwa, Kyohei Fujita, Toshihiro Ide. **Monash Stroke:** Henry Ma, John Ly, Shaloo Singhal, Ronil Chandra, Lee-anne Slater, Cathy Soufan, Christopher Moran. **Basel TIA and NOACISP:** Christopher Traenka, Sebastian Thilemann, Joachim Fladt, Henrik Gensicke, Leo H Bonati. **SNUBH Stroke cohort:** Beom Joon Kim, Moon-Ku Han, Jihoon Kang, Eunbin Ko, Mi Hwa Yang, Myung Suk Jang. **BIOSTROKE/TIA-Dublin:** Sean Murphy, Fiona Carty, Layan Akijian, John Thornton, Mark Schembri. **CASPER:** Elles Douven. **HERO:** Raquel Delgado-Mederos, Rebeca Marín, Pol Camps-Renom, Daniel Guisado-Alonso, Fidel Nuñez, Santiago Medrano-Martorell, Elisa Merino. **HAGAKURE:** Kotaro Iida, Syuhei Ikeda, Masashi Nishihara, Hiroyuki Irie. **Orken:** Derya Selcuk Demirelli. **CATCH:** Jayesh Modi Medanta, Charlotte Zerna. **MSS2:** Maria C Valdés Hernández, Paul Armitage, Anna K Heye, Susana Muñoz-Maniega, Eleni Sakka, Michael J Thrippleton, Martin Dennis. **Sainte-Anne:** Ysoline Beigneux, Mauro Silva. **Singapore:** Narayanaswamy Venketasubramanian. **HKU:** Shu Leung Ho, Raymond Tak Fai Cheung, Koon Ho Chan, Kay Cheong Teo, Edward S Hui, Joseph Shiu Kwong Kwan, Richard S.K. Chang, Man Yu Tse, Chu Peng Hoi, Chung Yan Chan, Oi Ling Chan, Ryan Hoi Kit Cheung, Edmund Ka Ming Wong. **IPAAC:** Kam Tat Leung, Suk Fung Tsang, Hing Lung Ip, Sze Ho Ma, Karen Ma, Wing Chi Fong, Siu Hung Li, Richard Li, Ping Wing Ng, Kwok Kui Wong, Wenyan Liu, Lawrence Wong. **MICRO:** Lino Ramos, Els De Schryver, Joost Jöbssis, Jaap van der Sande, Paul Brouwers, Yvo Roos, Jan Stam, Stef Bakker, Henk Verbiest, Wouter Schoonewille, Cisca Linn, Leopold Hertzberger, Maarten van Gemert, Paul Berntsen. **PARISK:** Jeroen Hendrikse, Paul J. Nederkoorn, Werner Mess, Peter J. Koudstaal. **SIGNaL:** Alexander Leff, Nicholas Ward, Parashkev Nachev, Richard J Perry, Hatice Ozkan, John Mitchell.

**Table 1: Risk of bias assessment for the included cohorts**

| Cohort              | Selection of cohorts | Assessment of exposure | Outcomes of interest not present at study inception? | Adjusting for variables associated with outcome | Assessment of presence/ absence of prognostic variables | Confidence in assessment of outcome | Follow up adequate? | Co-interventions similar between the groups? |
|---------------------|----------------------|------------------------|------------------------------------------------------|-------------------------------------------------|---------------------------------------------------------|-------------------------------------|---------------------|----------------------------------------------|
| CROMIS-2            | ++                   | ++                     | ++                                                   | ++                                              | ++                                                      | ++                                  | ++                  | +                                            |
| HBS                 | ++                   | ++                     | ++                                                   | ++                                              | ++                                                      | ++                                  | ++                  | +                                            |
| Bern                | ++                   | ++                     | ++                                                   | ++                                              | ++                                                      | +                                   | +                   | +                                            |
| CU-STRIDE           | ++                   | ++                     | ++                                                   | ++                                              | ++                                                      | ++                                  | ++                  | +                                            |
| TABASCO             | ++                   | ++                     | ++                                                   | ++                                              | ++                                                      | ++                                  | ++                  | +                                            |
| Graz                | ++                   | +                      | ++                                                   | ++                                              | ++                                                      | +                                   | +                   | +                                            |
| PERFORM-MRI         | ++                   | +                      | ++                                                   | ++                                              | ++                                                      | ++                                  | ++                  | ++                                           |
| PARISK              | ++                   | ++                     | ++                                                   | ++                                              | ++                                                      | ++                                  | ++                  | ++                                           |
| SAMURAI             | ++                   | ++                     | ++                                                   | ++                                              | ++                                                      | ++                                  | ++                  | +                                            |
| RUNDMC              | ++                   | ++                     | ++                                                   | ++                                              | ++                                                      | ++                                  | ++                  | +                                            |
| Wuerzburg           | ++                   | ++                     | ++                                                   | ++                                              | ++                                                      | +                                   | ++                  | ++                                           |
| Monash Stroke       | ++                   | ++                     | ++                                                   | ++                                              | ++                                                      | ++                                  | ++                  | +                                            |
| Basal TIA           | ++                   | ++                     | ++                                                   | ++                                              | ++                                                      | ++                                  | ++                  | ++                                           |
| Yonsei              | ++                   | ++                     | ++                                                   | ++                                              | ++                                                      | +                                   | ++                  | ++                                           |
| SNUBH Stroke Cohort | ++                   | ++                     | ++                                                   | ++                                              | ++                                                      | +                                   | ++                  | +                                            |
| BIOSTROKE/TIA       | ++                   | ++                     | ++                                                   | ++                                              | ++                                                      | +                                   | ++                  | +                                            |
| Kushiro City        | ++                   | ++                     | ++                                                   | ++                                              | ++                                                      | ++                                  | ++                  | ++                                           |
| Soo                 | ++                   | ++                     | ++                                                   | ++                                              | ++                                                      | ++                                  | ++                  | +                                            |
| CASPER              | ++                   | +                      | ++                                                   | ++                                              | ++                                                      | ++                                  | ++                  | +                                            |
| HERO                | ++                   | ++                     | ++                                                   | ++                                              | ++                                                      | ++                                  | ++                  | ++                                           |
| HAGAKURE            | ++                   | ++                     | ++                                                   | ++                                              | ++                                                      | ++                                  | ++                  | ++                                           |
| Leuven              | ++                   | ++                     | ++                                                   | ++                                              | ++                                                      | ++                                  | ++                  | +                                            |
| NOACISP             | ++                   | +                      | ++                                                   | ++                                              | ++                                                      | ++                                  | ++                  | ++                                           |
| Min Lou             | ++                   | ++                     | ++                                                   | ++                                              | ++                                                      | ++                                  | +                   | +                                            |
| MICRO               | ++                   | ++                     | ++                                                   | ++                                              | ++                                                      | ++                                  | ++                  | +                                            |
| Orken               | ++                   | ++                     | ++                                                   | ++                                              | ++                                                      | +                                   | ++                  | +                                            |
| CATCH               | ++                   | ++                     | ++                                                   | ++                                              | ++                                                      | ++                                  | ++                  | +                                            |
| MSS2                | ++                   | ++                     | ++                                                   | ++                                              | ++                                                      | ++                                  | +                   | ++                                           |
| Sainte-Anne         | ++                   | ++                     | ++                                                   | ++                                              | ++                                                      | ++                                  | ++                  | +                                            |
| STROKEDEM           | ++                   | ++                     | ++                                                   | ++                                              | ++                                                      | ++                                  | ++                  | ++                                           |
| Singapore           | ++                   | ++                     | ++                                                   | ++                                              | ++                                                      | +                                   | ++                  | ++                                           |
| Future Study        | ++                   | +                      | ++                                                   | ++                                              | ++                                                      | ++                                  | ++                  | +                                            |
| Heidelberg          | ++                   | ++                     | ++                                                   | ++                                              | ++                                                      | +                                   | ++                  | +                                            |
| NNI                 | ++                   | ++                     | ++                                                   | ++                                              | ++                                                      | ++                                  | ++                  | +                                            |
| OXVASC              | ++                   | ++                     | ++                                                   | ++                                              | ++                                                      | ++                                  | ++                  | ++                                           |
| HKU                 | ++                   | ++                     | ++                                                   | ++                                              | ++                                                      | ++                                  | ++                  | ++                                           |
| IPAAC Warfarin      | ++                   | ++                     | ++                                                   | ++                                              | ++                                                      | ++                                  | ++                  | ++                                           |
| SIGNaL              | ++                   | ++                     | ++                                                   | ++                                              | ++                                                      | ++                                  | ++                  | ++                                           |

**Four-point risk of bias scale: ++ Low risk of bias, + minor risk of bias, -some risk of bias, -- high risk of bias**

Studies were not eligible for inclusion if any of the criteria below were scored as - or --

**Key for risk of bias assessment criteria**

**Selection of cohorts:** ++ if exposed and unexposed participants are recruited from the same populations over the same time periods

**Assessment of exposure:** ++ use of validated scale for rating CMBs; + use of defined criteria for CMBS

**Outcome of interest not present at study inception?** ++ for all studies (all outcomes of interest require re-hospitalisation for an outcome event)

**Adjusting for variables associated with outcome:** ++ or + for all studies as we defined prespecified criteria for study entry

**Assessment of presence or absence of prognostic variables:** ++ if studies used pre-defined criteria for hypertension, diabetes, etc.

**Confidence in assessment of outcome:** ++ if outcome adjudicated blinded to CMBs; + if outcome was not adjudicated but blinded to CMBs and with imaging confirmation

**Follow up adequate?** ++ if less than 5% loss to follow up; + if less than 20% loss to follow up. As we used survival analysis, censoring is unlikely to introduce bias for studies with short follow up times

**Co-interventions similar between the groups?** ++ if antithrombotic decisions were made blinded to CMB presence; + if antithrombotic decisions were not blinded to CMB presence, but antithrombotic choices were similar among the CMB and non-CMB groups

**Table 2. Baseline characteristics of patients with and without cerebral microbleeds (CMBs)**

| <b>Variable</b>                                            | <b>CMBs present n=5649</b> | <b>CMBs absent n=14673</b> | <b>p value</b> |
|------------------------------------------------------------|----------------------------|----------------------------|----------------|
| <b>Age, mean (SD)</b>                                      | 73 (13)                    | 69 (11)                    | <0-0001        |
| <b>Sex (female), n (%)</b>                                 | 2314 (41)                  | 6279/14665 (43)            | 0-0166         |
| <b>Hypertension, n (%)</b>                                 | 4338/5639 (78)             | 9977/14632 (68)            | <0-0001        |
| <b>Previous stroke n (%)</b>                               | 1217/5644 (22)             | 2082/14646 (14)            | <0-0001        |
| <b>Diabetes, n (%)</b>                                     | 1380/5247 (26)             | 3121/12921 (24)            | 0-0024         |
| <b>Regular anticoagulants prior to index stroke, n (%)</b> | 392/3832 (10)              | 833/10335 (8)              | <0-0001        |
| <b>Regular antiplatelets prior to index stroke, n (%)</b>  | 1427/3829 (37)             | 3340/10315 (32)            | <0-0001        |
| <b>Ischaemic heart disease, n (%)</b>                      | 829/5322 (16)              | 1779/13520 (13)            | <0-0001        |
| <b>Antiplatelets at discharge, n (%)</b>                   | 3749 (66)                  | 9606/14665 (66)            | 0-239          |
| <b>Anticoagulants at discharge, n (%)</b>                  | 2062 (37)                  | 5675 (39)                  | 0-00381        |
| <b>Statins on discharge, n (%)</b>                         | 2859/4377 (65)             | 7044/11100 (63)            | 0-0300         |

**Table 3. Baseline characteristics of patients with and without any composite event (intracranial haemorrhage or ischaemic stroke) during follow up**

| Variable                                                  | All patients<br>(n=20332) | Any composite event<br>n=1461 | No composite event<br>n=18861 | p value  |
|-----------------------------------------------------------|---------------------------|-------------------------------|-------------------------------|----------|
| Age, mean (SD)                                            | 70 (12)                   | 72 (12)                       | 70 (13)                       | <0-0001  |
| Sex (female), n (%)                                       | 8593/20314 (42)           | 621 (43)                      | 7972/18853 (42)               | 0-870    |
| Hypertension, n (%)                                       | 14365/20271 (71)          | 1102/1460 (75)                | 13263/18811 (71)              | <0-0001  |
| Previous stroke,<br>n (%)                                 | 3299/20290 (16)           | 371/1459 (25)                 | 2928/18831 (16)               | <0-0001  |
| Diabetes, n (%)                                           | 4501/18168 (25)           | 375/1301 (29)                 | 4126/16867 (24)               | <0-0001  |
| Regular anticoagulants<br>prior to index stroke,<br>n (%) | 1225/14167 (9)            | 116/1043 (11)                 | 1109/13124 (8)                | 0-00313  |
| Regular antiplatelets<br>prior to index stroke,<br>n (%)  | 4767/14144 (34)           | 401/1041 (39)                 | 4366/13103 (33)               | 0-000635 |
| Ischaemic heart disease,<br>n (%)                         | 2608/18842 (14)           | 248/1409 (18)                 | 2360/17433 (14)               | <0-0001  |
| Cerebral microbleed<br>presence, n (%)                    | 5649 (28)                 | 542 (37)                      | 5107 (27)                     | <0-0001  |
| Antiplatelets at<br>discharge, n (%)                      | 12715/20312 (62)          | 1016 (70)                     | 12339/18852 (65)              | 0-002    |
| Anticoagulants at<br>discharge, n (%)                     | 7690 (38)                 | 500 (34)                      | 7237/18858 (38)               | 0-002    |
| Statins on discharge,<br>n (%)                            | 9903/15477 (64)           | 652/1079 (60)                 | 9251/14398 (64)               | 0-0116   |



**Table 4. Baseline characteristics of patients with and without intracranial haemorrhage during follow up**

| <b>Variable</b>                                            | <b>Intracranial haemorrhage present n=189</b> | <b>Intracranial haemorrhage absent n=16778</b> | <b>p value</b> |
|------------------------------------------------------------|-----------------------------------------------|------------------------------------------------|----------------|
| <b>Age, mean (SD)</b>                                      | 75 (11)                                       | 71 (12)                                        | <0.0001        |
| <b>Sex (female), n (%)</b>                                 | 84 (44)                                       | 7162/16770 (43)                                | 0.631          |
| <b>Hypertension, n (%)</b>                                 | 146 (77)                                      | 11895/16728 (71)                               | 0.0638         |
| <b>Previous stroke n (%)</b>                               | 52/188 (28)                                   | 2760/16747 (16)                                | <0.0001        |
| <b>Diabetes, n (%)</b>                                     | 46/174 (26)                                   | 3437/14639 (23)                                | 0.360          |
| <b>Regular anticoagulants prior to index stroke, n (%)</b> | 15/174 (9)                                    | 1210/13993 (9)                                 | 0.990          |
| <b>Regular antiplatelets prior to index stroke, n (%)</b>  | 62/173 (36)                                   | 4705/13971 (34)                                | 0.550          |
| <b>Ischaemic heart disease, n (%)</b>                      | 30/182 (16)                                   | 2294/15503 (15)                                | 0.575          |
| <b>Cerebral microbleed presence, n (%)</b>                 | 98 (52)                                       | 4385 (26)                                      | <0.0001        |
| <b>Antiplatelets at discharge, n (%)</b>                   | 108 (57)                                      | 10143/16769 (60)                               | 0.350          |
| <b>Anticoagulants at discharge, n (%)</b>                  | 91 (48)                                       | 7021 (42)                                      | 0.081          |
| <b>Statins on discharge, n (%)</b>                         | 75/135 (56)                                   | 7106/11988 (59)                                | 0.382          |

**Table 5: Baseline characteristics of patients with and without ischaemic stroke during follow up**

| Variable                                            | Ischaemic stroke present<br>n=1113 | Ischaemic stroke absent<br>n=15854 | p value  |
|-----------------------------------------------------|------------------------------------|------------------------------------|----------|
| Age, mean (SD)                                      | 72 (11)                            | 71 (12)                            | 0-0004   |
| Sex (female), n (%)                                 | 467 (42)                           | 6779/15846 (43)                    | 0-592    |
| Hypertension, n (%)                                 | 836/1112 (75)                      | 11205/15805 (71)                   | 0-0230   |
| Previous stroke n (%)                               | 286/1112 (26)                      | 2526/15823 (16)                    | <0-0001  |
| Diabetes, n (%)                                     | 280/968 (29)                       | 3203/13845 (23)                    | <0-0001  |
| Regular anticoagulants prior to index stroke, n (%) | 103/882 (12)                       | 1122/13285 (8)                     | 0-000941 |
| Regular antiplatelets prior to index stroke, n (%)  | 347/881 (39)                       | 4420/13263 (33)                    | 0-000228 |
| Ischaemic heart disease, n (%)                      | 200/1068 (19)                      | 2124/14419 (15)                    | 0-000418 |
| Cerebral microbleed presence, n (%)                 | 380 (43)                           | 4103 (26)                          | <0-0001  |
| Antiplatelets at discharge, n (%)                   | 673 (60)                           | 8938/15844 (56)                    | 0-00832  |
| Anticoagulants at discharge, n (%)                  | 376 (35)                           | 6728 (42)                          | <0-0001  |
| Statins on discharge, n (%)                         | 434/781 (56)                       | 6747/11342 (59)                    | 0-0312   |

Figure 1: Kaplan Meier curves for CMB distributions and outcomes: A) Composite outcome; B) Intracranial haemorrhage; C) Ischaemic stroke

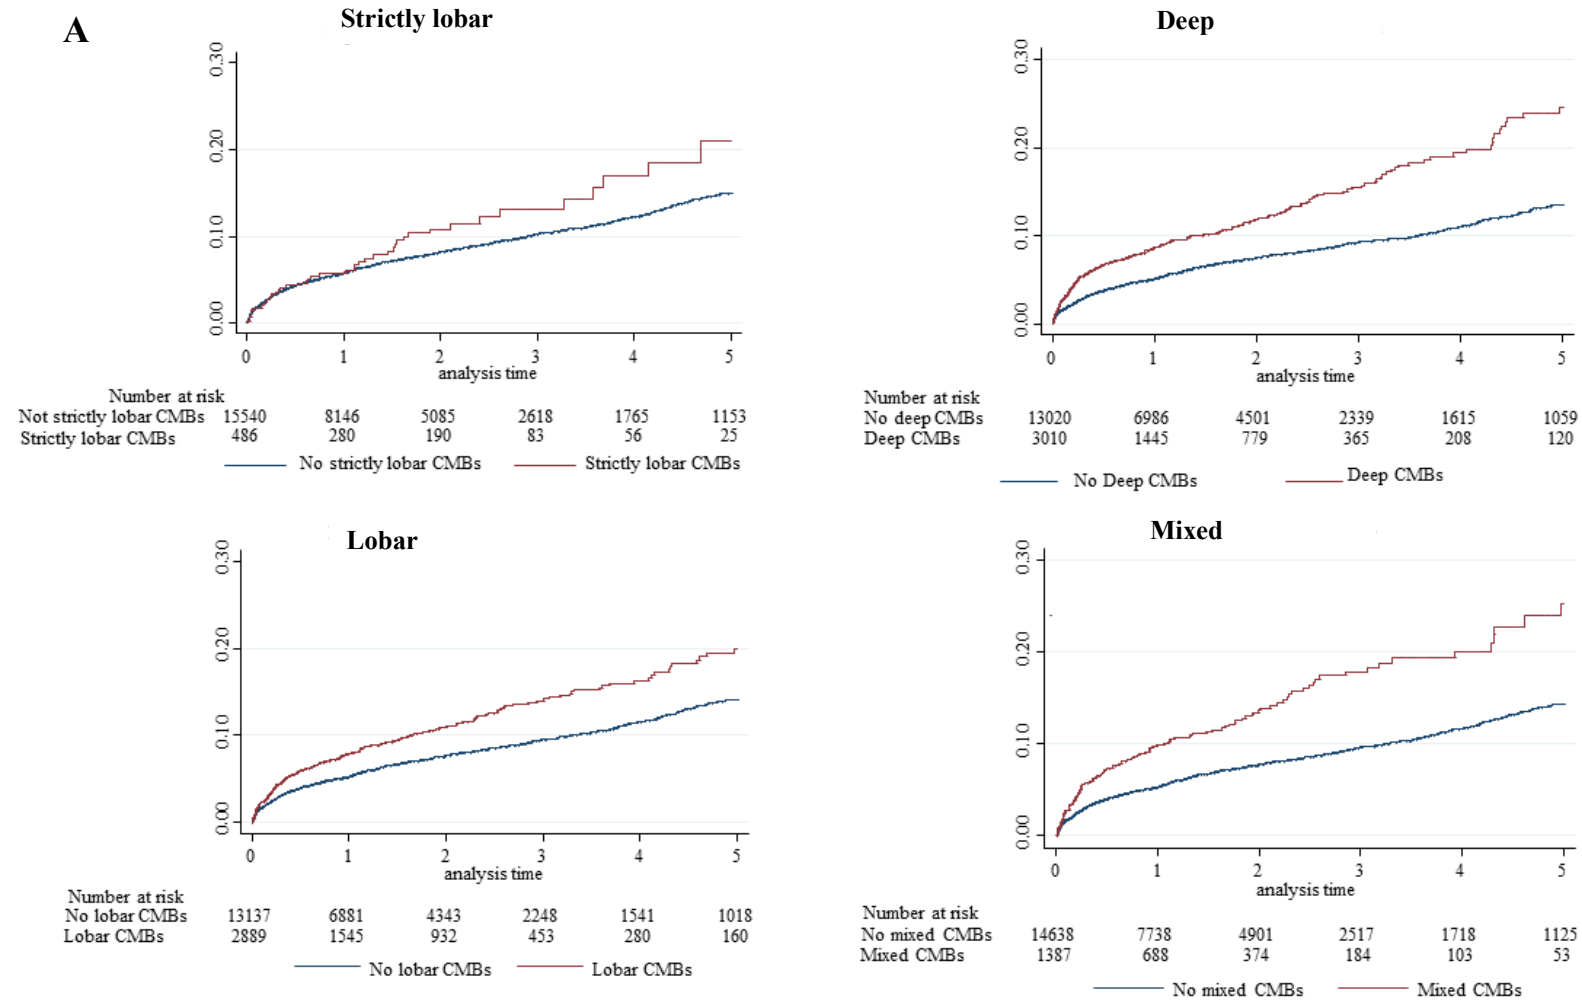

**B**

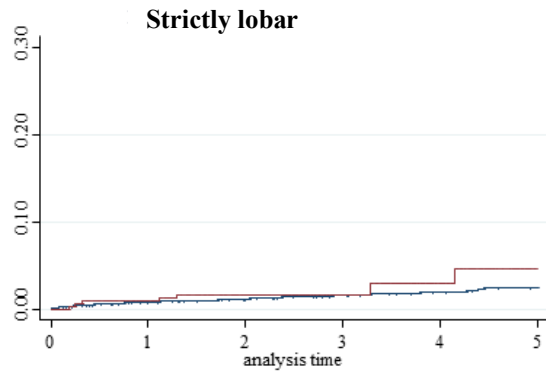

|                        | Number at risk |      |      |      |      |      |
|------------------------|----------------|------|------|------|------|------|
|                        | 0              | 1    | 2    | 3    | 4    | 5    |
| No strictly lobar CMBs | 12231          | 7441 | 5206 | 2705 | 1834 | 1198 |
| Strictly lobar CMBs    | 421            | 272  | 200  | 87   | 59   | 27   |

— No strictly lobar CMBs — Strictly lobar CMBs

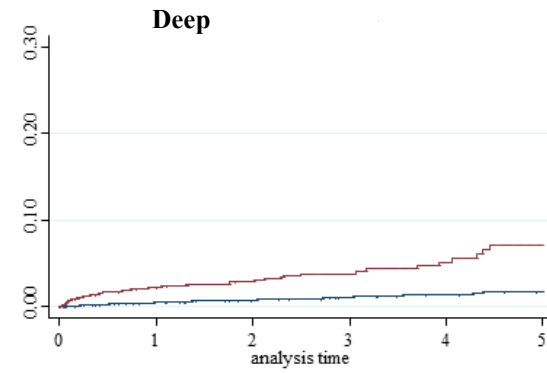

|              | Number at risk |      |      |      |      |      |
|--------------|----------------|------|------|------|------|------|
|              | 0              | 1    | 2    | 3    | 4    | 5    |
| No deep CMBs | 10543          | 6486 | 4622 | 2415 | 1672 | 1099 |
| Deep CMBs    | 2113           | 1232 | 789  | 380  | 223  | 127  |

— No deep CMBs — Deep CMBs

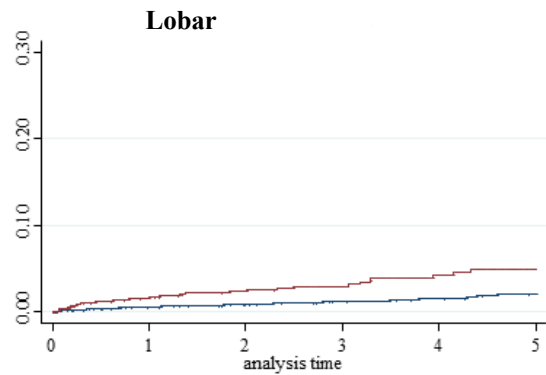

|               | Number at risk |      |      |      |      |      |
|---------------|----------------|------|------|------|------|------|
|               | 0              | 1    | 2    | 3    | 4    | 5    |
| No lobar CMBs | 10386          | 6308 | 4447 | 2324 | 1599 | 1056 |
| Lobar CMBs    | 2266           | 1405 | 959  | 468  | 294  | 169  |

— No lobar CMBs — Lobar CMBs

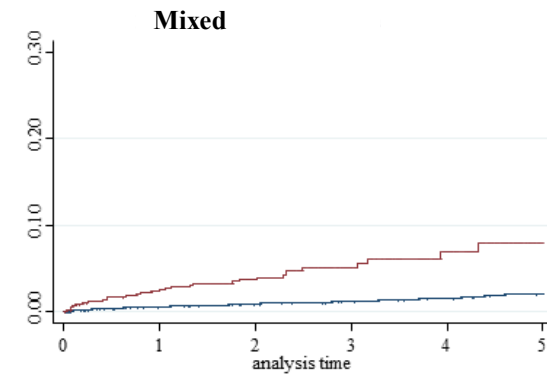

|               | Number at risk |      |      |      |      |      |
|---------------|----------------|------|------|------|------|------|
|               | 0              | 1    | 2    | 3    | 4    | 5    |
| No mixed CMBs | 11614          | 7107 | 5024 | 2601 | 1781 | 1168 |
| Mixed CMBs    | 1037           | 606  | 382  | 191  | 112  | 57   |

— No mixed CMBs — mixed CMBs

C

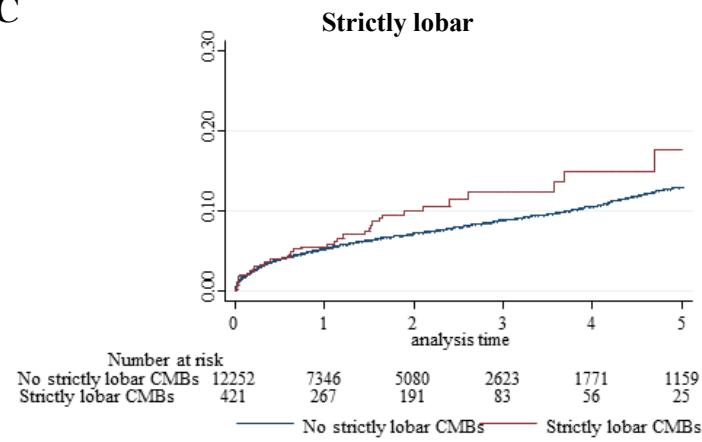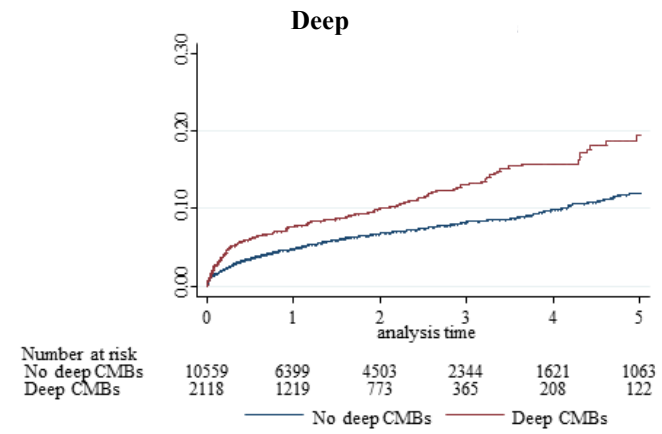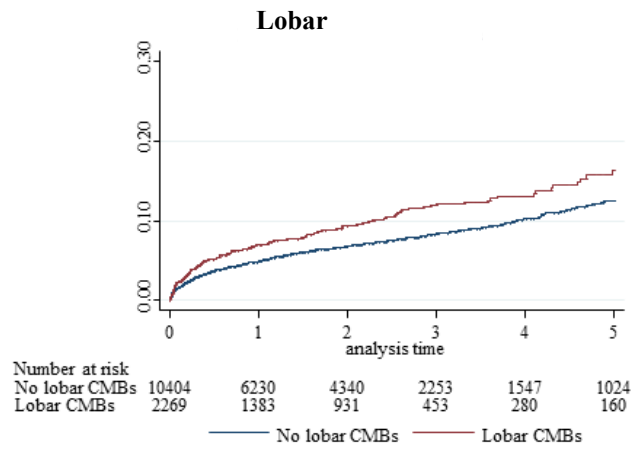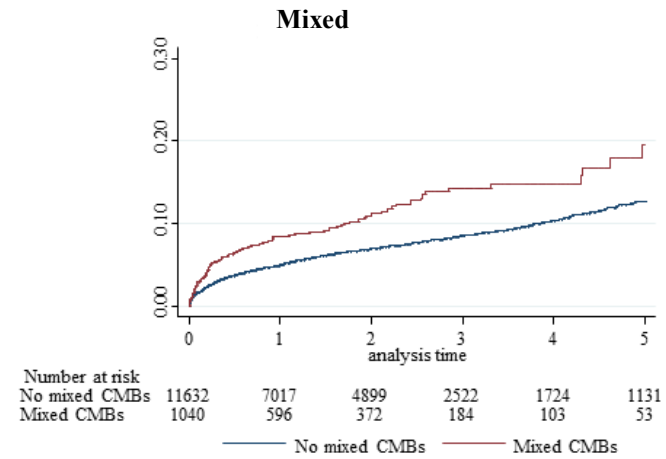

**Figure 2: Kaplan Meier curves for CMB presence and burden in (A) Patients treated with oral anticoagulants (with or without antiplatelet drugs) (n=7,737); and (B) Patients treated with antiplatelet drugs only (n=11,520)**

**A**

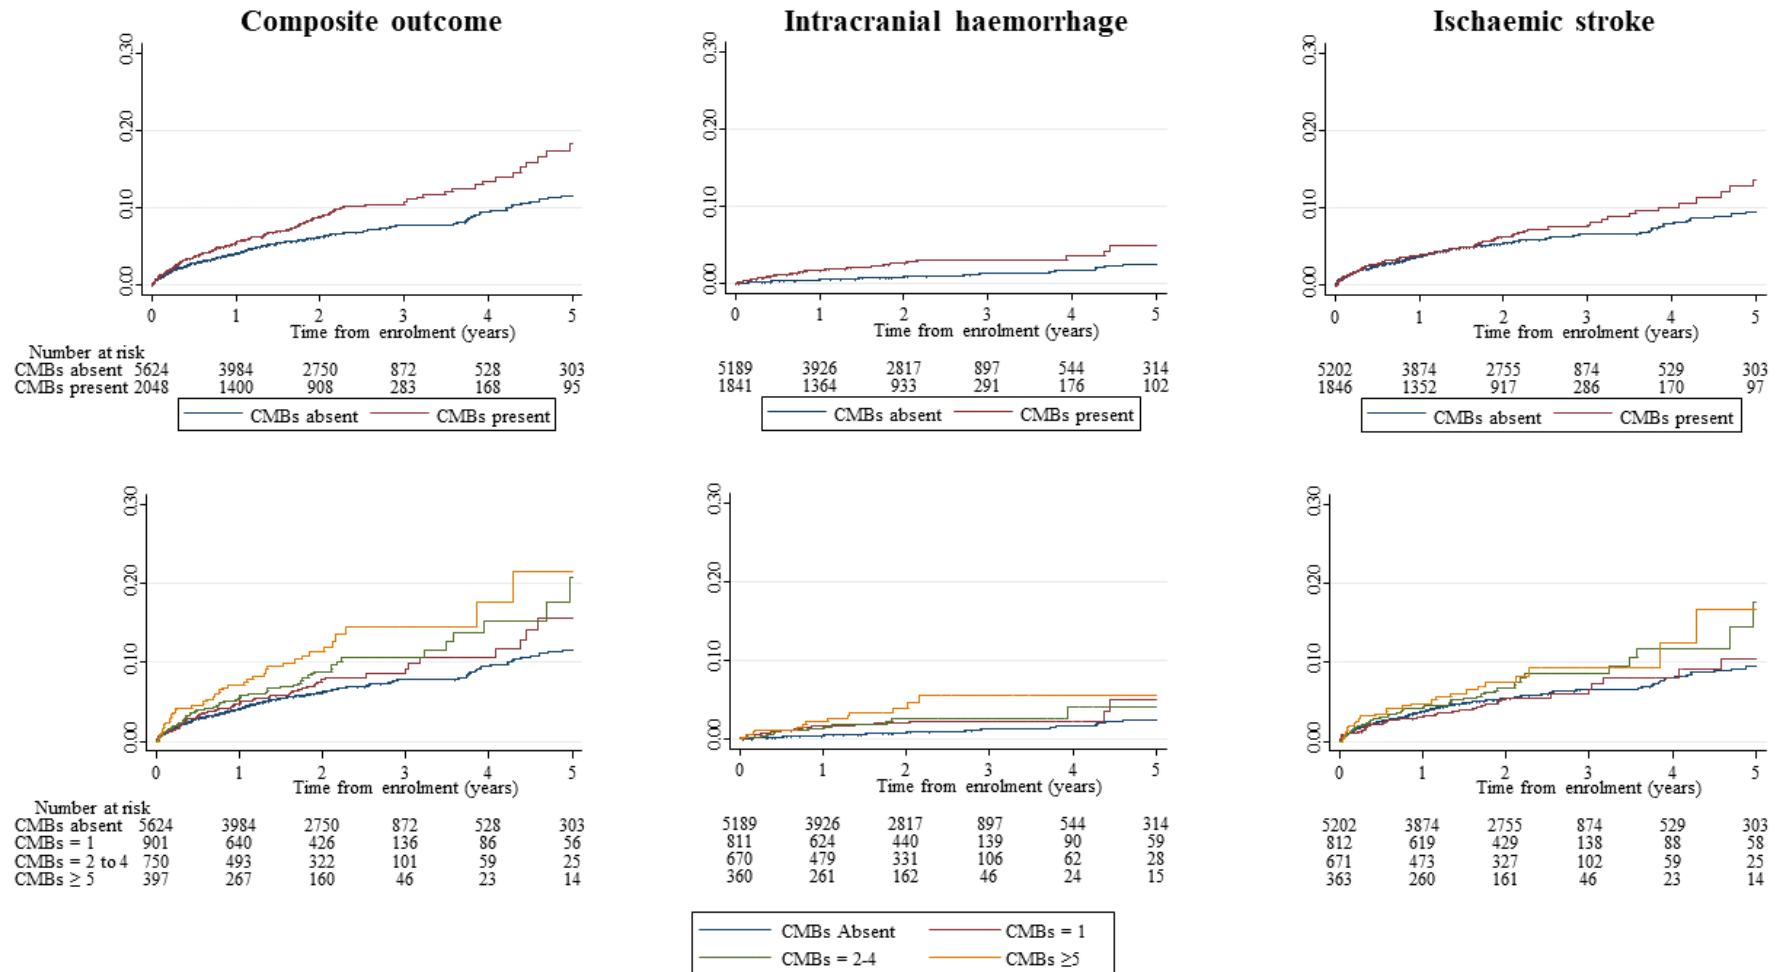

**B**

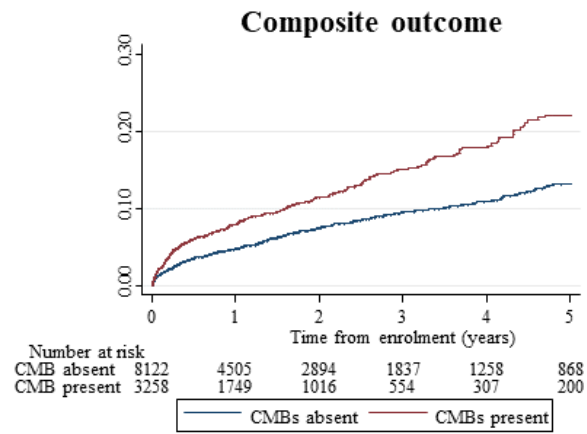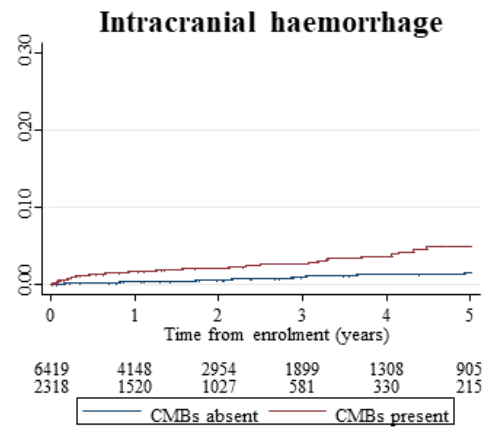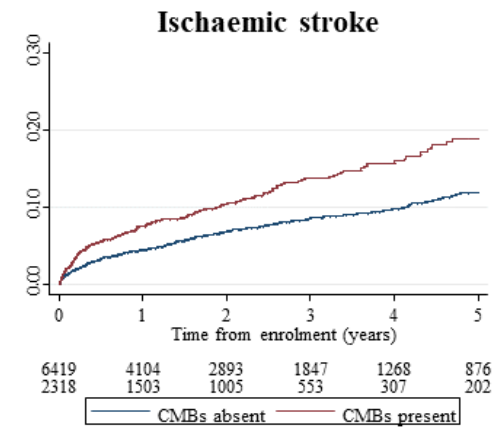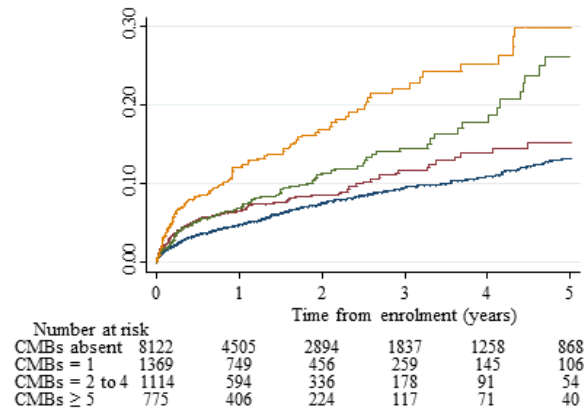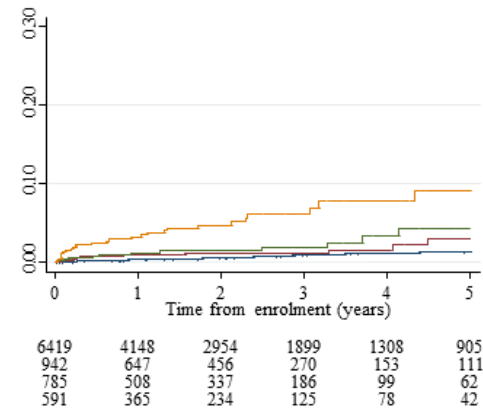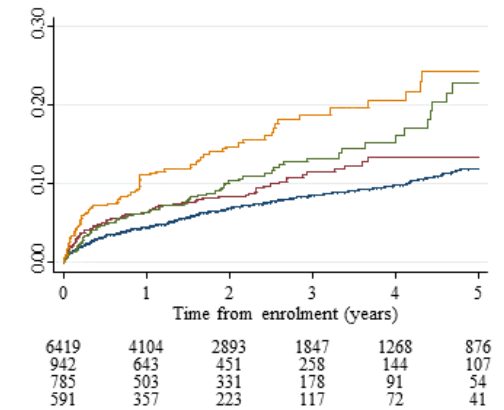

Figure 3. Forest plots for each outcome for all cohorts

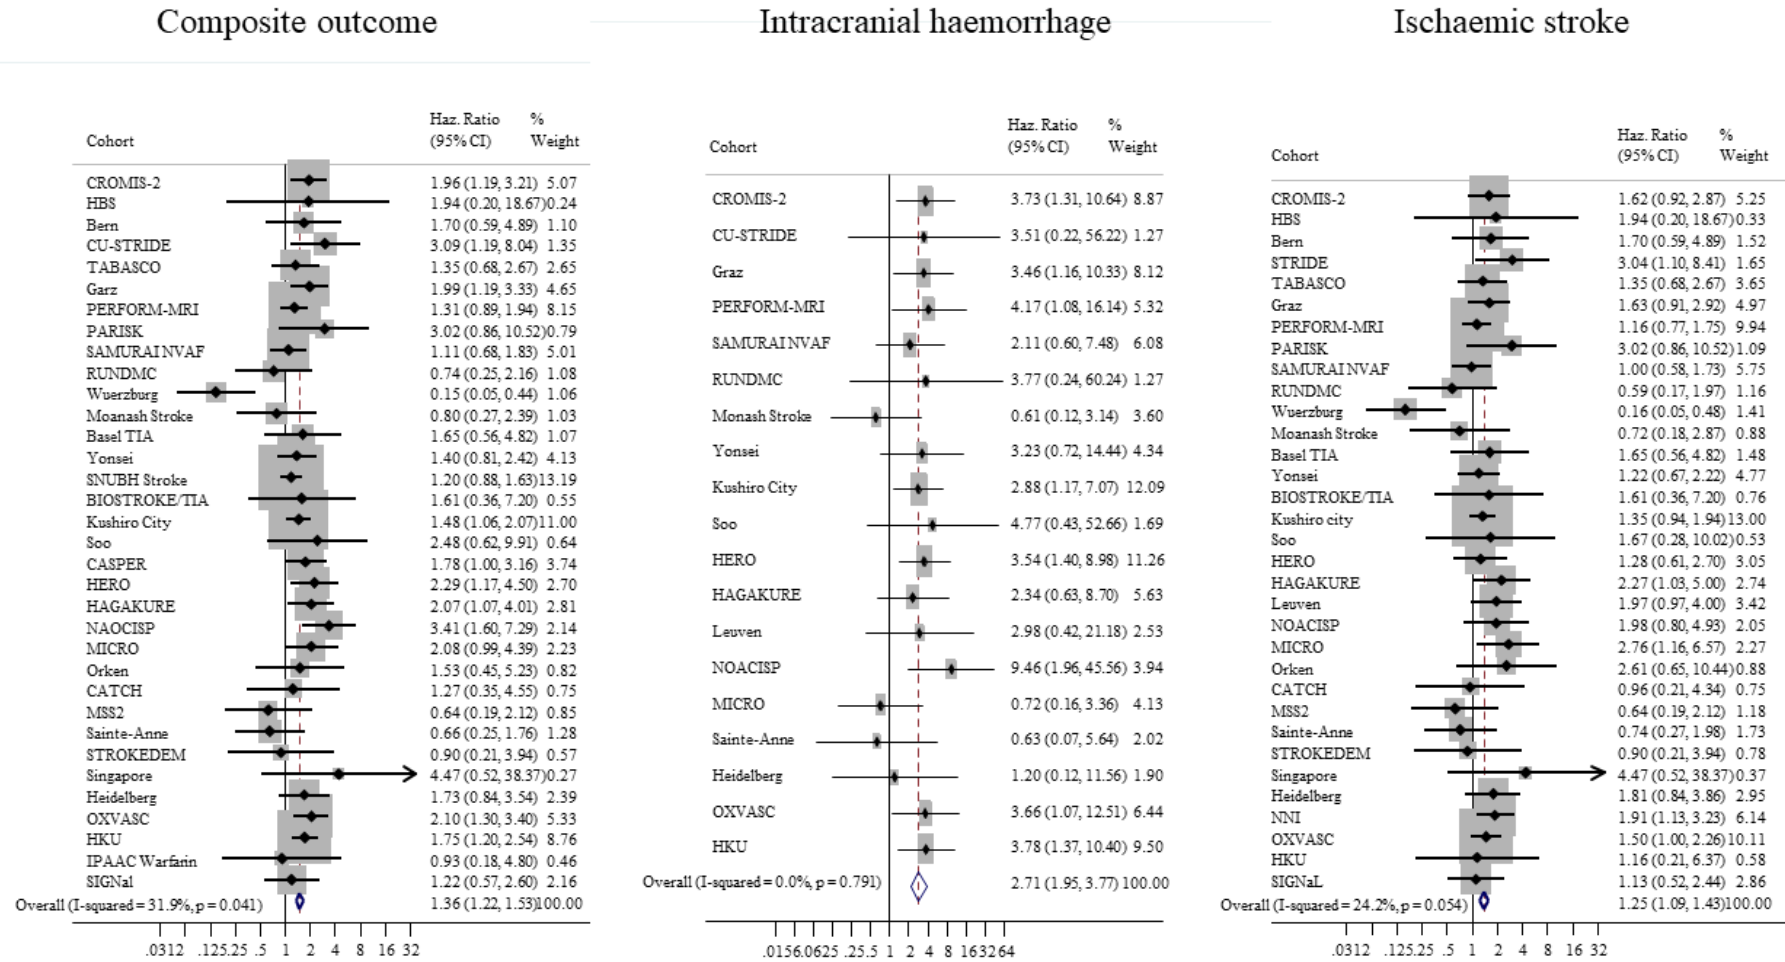



**Table 6. Incidence and risk of outcome events according to baseline CMB in patients treated with antiplatelets only.**

| PATIENTS TREATED WITH ANTIPLATELET DRUGS ONLY (n=11520)                                         |                           |                                        |                                                                 |                                      |                                                                          |                                        |                                                                 |                                      |                                                                  |                                        |                                                                 |                                      |
|-------------------------------------------------------------------------------------------------|---------------------------|----------------------------------------|-----------------------------------------------------------------|--------------------------------------|--------------------------------------------------------------------------|----------------------------------------|-----------------------------------------------------------------|--------------------------------------|------------------------------------------------------------------|----------------------------------------|-----------------------------------------------------------------|--------------------------------------|
| Composite of intracranial haemorrhage and ischaemic stroke<br>(n=11312 in multivariable models) |                           |                                        |                                                                 |                                      | Symptomatic intracranial haemorrhage<br>(n=8670 in multivariable models) |                                        |                                                                 |                                      | Symptomatic ischaemic stroke<br>(n=8670 in multivariable models) |                                        |                                                                 |                                      |
|                                                                                                 | n/time at risk<br>(years) | Rate/1000<br>patient years<br>(95% CI) | Absolute rate<br>increase/<br>1000 patient<br>years<br>(95% CI) | Adjusted<br>Hazard ratio<br>(95% CI) | n/time at risk<br>(years)                                                | Rate/1000<br>patient years<br>(95% CI) | Absolute rate<br>increase/<br>1000 patient<br>years<br>(95% CI) | Adjusted<br>Hazard ratio<br>(95% CI) | n/time at risk<br>(years)                                        | Rate/1000<br>patient years<br>(95% CI) | Absolute rate<br>increase/<br>1000 patient<br>years<br>(95% CI) | Adjusted<br>Hazard ratio<br>(95% CI) |
| <b>No CMB</b>                                                                                   | 544/14798                 | 37 (34 to 40)                          | <i>Reference</i>                                                | <i>Reference</i>                     | 41/13518                                                                 | 3 (2 to 4)                             | <i>Reference</i>                                                | <i>Reference</i>                     | 424/13290                                                        | 32 (29 to 35)                          | <i>Reference</i>                                                | <i>Reference</i>                     |
| <b>CMB present</b>                                                                              | 343/5301                  | 65 (58 to 72)                          | 28 (24 to 32)                                                   | 1.38 (1.19 to 1.59)                  | 52/4541                                                                  | 11 (9 to 15)                           | 8 (7 to 11)                                                     | 2.59 (1.68 to 4.00)                  | 240/4442                                                         | 54 (47 to 61)                          | 22 (18 to 26)                                                   | 1.32 (1.11 to 1.56)                  |
| <b>1 CMB</b>                                                                                    | 114/2340                  | 49 (40 to 59)                          | 12 (6 to 19)                                                    | 1.20 (0.97 to 1.47)                  | 12/1984                                                                  | 6 (3 to 11)                            | 3 (1 to 7)                                                      | 1.60 (0.83 to 3.08)                  | 82/1951                                                          | 42 (33 to 52)                          | 10 (4 to 17)                                                    | 1.22 (0.96 to 1.55)                  |
| <b>2-4 CMBs</b>                                                                                 | 111/1759                  | 63 (52 to 76)                          | 26 (18 to 36)                                                   | 1.25 (1.02 to 1.55)                  | 13/1487                                                                  | 9 (5 to 15)                            | 6 (3 to 11)                                                     | 1.82 (0.95 to 3.47)                  | 78/1457                                                          | 54 (42 to 67)                          | 22 (13 to 32)                                                   | 1.20 (0.94 to 1.55)                  |
| <b>≥5 CMBs*</b>                                                                                 | 118/1203                  | 98 (81 to 117)                         | 61 (47 to 77)                                                   | 1.85 (1.50 to 2.28)                  | 27/1069                                                                  | 25 (17 to 37)                          | 22 (15 to 33)                                                   | 5.69 (3.36 to 9.65)                  | 80/1034                                                          | 77 (61 to 96)                          | 45 (32 to 61)                                                   | 1.63 (1.27 to 2.09)                  |
| <b>≥10 CMBs*</b>                                                                                | 59/593                    | 99 (76 to 128)                         | 62 (42 to 88)                                                   | 1.82 (1.38 to 2.40)                  | 16/519                                                                   | 31 (18 to 50)                          | 28 (16 to 46)                                                   | 6.81 (3.67 to 12.63)                 | 37/511                                                           | 72 (51 to 100)                         | 40 (22 to 65)                                                   | 1.47 (1.04 to 2.07)                  |
| <b>≥20 CMBs*</b>                                                                                | 30/221                    | 136 (92 to 194)                        | 99 (58 to 154)                                                  | 2.86 (1.97 to 4.96)                  | 11/194                                                                   | 57 (28 to 101)                         | 54 (26 to 97)                                                   | 15.71 (7.69 to 32.11)                | 16/192                                                           | 83 (48 to 135)                         | 51 (19 to 100)                                                  | 2.00 (1.20 to 3.32)                  |
| <b>Mixed CMBs</b>                                                                               | 102/1121                  | 91 (74 to 110)                         | 54 (40 to 70)                                                   | 1.21 (0.96 to 1.52)                  | 24/896                                                                   | 27 (17 to 40)                          | 24 (15 to 36)                                                   | 2.90 (1.64 to 5.13)                  | 60/867                                                           | 69 (53 to 89)                          | 37 (21 to 54)                                                   | 1.03 (0.76 to 1.39)                  |
| <b>Deep CMBs</b>                                                                                | 193/2320                  | 83 (72 to 96)                          | 46 (38 to 56)                                                   | 1.22 (1.02 to 1.47)                  | 34/1692                                                                  | 20 (14 to 28)                          | 17 (12 to 24)                                                   | 2.63 (1.54 to 4.47)                  | 116/1647                                                         | 70 (58 to 84)                          | 38 (29 to 49)                                                   | 1.11 (0.88 to 1.40)                  |
| <b>Lobar CMBs</b>                                                                               | 180/2423                  | 74 (64 to 86)                          | 37 (30 to 46)                                                   | 1.26 (1.05 to 1.52)                  | 31/2029                                                                  | 15 (10 to 22)                          | 12 (8 to 18)                                                    | 2.44 (1.44 to 4.15)                  | 123/1973                                                         | 62 (52 to 74)                          | 30 (23 to 39)                                                   | 1.26 (1.01 to 1.57)                  |
| <b>Probable CAA</b>                                                                             | 32/372                    | 86 (59 to 121)                         | 49 (25 to 81)                                                   | 1.52 (1.07 to 2.18)                  | 3/340                                                                    | 9 (2 to 26)                            | 6 (0 to 22)                                                     | 1.43 (0.44 to 4.59)                  | 28/326                                                           | 86 (57 to 124)                         | 54 (28 to 89)                                                   | 1.79 (1.21 to 2.63)                  |

**Footnote:** CMB location HRs are compared to patients without CMBs in each location and are adjusted for CMB number in addition to our pre-specified variables, \*overlapping categories

## **Secondary outcomes and sensitivity analyses**

### **Secondary outcomes: death and vascular death**

There were 2418 deaths, 484 of which were vascular. In multivariable analyses, CMB presence was not associated with all-cause death (aHR 1.03, 95% CI 0.94-1.12) or vascular death (aHR 0.97, 95% CI 0.79-1.19).

### **Ethnicity**

There was no interaction between CMB and ethnicity (n=15123; 6743 white, 8380 Asian) for the risks of: the composite outcome of intracranial haemorrhage or ischaemic stroke (p-interaction=0.707); intracranial haemorrhage (p-interaction=0.537); or ischaemic stroke (p-interaction=0.654).

### **Age**

There was no interaction between CMB and older age (4376 patients aged >80 years) for the risk of the composite outcome of intracranial haemorrhage or ischaemic stroke (p-interaction=0.538); intracranial haemorrhage (p-interaction=0.219); or ischaemic stroke (p-interaction=0.286).

### **Sensitivity analysis to quantify heterogeneity**

Using a two-stage meta-analysis, the estimated risks associated with CMB presence were consistent with our main model for: the composite of intracranial haemorrhage or ischaemic stroke (heterogeneity ( $I^2=31.7\%$ )); intracranial haemorrhage ( $I^2=0\%$ ); and ischaemic stroke ( $I^2=24.2\%$ ). The forest plots are shown above, in appendix Figure 3.

### **Sensitivity analysis including white matter hyperintensities**

23 cohorts, including 10,235 patients, provided ratings for WMH, which were moderate to severe (Fazekas grade $\geq 2$ ) in 3,105 (30%). Including WMH in multivariable models did not substantially change the aHR

associated with the presence of CMBs for the composite outcome (aHR 1.30, 95% CI 1.12-1.52), intracranial haemorrhage (aHR 2.44, 95% CI 1.68-3.53) or for ischaemic stroke (aHR 1.16, 95% CI 0.98-1.37).

**Sensitivity analysis including only intracerebral, convexity subarachnoid and subdural intracranial haemorrhage**

183 patients had a symptomatic intracranial haemorrhage during 32,847 patient-years of follow up. The risk of symptomatic intracranial haemorrhage was 2.59 (95% CI 1.91-3.50) times higher for patients with CMBs than patients without CMBs and rose with increasing CMB burden. Compared to no CMBs, aHRs were: 1.92 (95% CI 1.25-2.94) for 1 CMB; 2.02 (95% CI 1.30-3.16) for 2-4 CMBs; 4.88 (95% CI 3.29-7.25) for  $\geq 5$  CMBs; 5.87 (95% CI 3.56-9.66) for  $\geq 10$  CMBs; and 9.32 (95% CI 5.06-17.16) for  $\geq 20$  CMBs. These results are consistent with our primary findings.

**Incidence of outcome events beyond the first year and change in risks over time**

There were 102 intracranial haemorrhage events over 12,794 patient-years of follow up within the first year, and 87 symptomatic intracranial haemorrhages over 31,059 patient-years of follow-up after the first year. In patients with CMBs, the incidence of intracranial haemorrhage (per 1000 patients-years) was 18 (95% CI 14-23) within the first year, and 5 (95% CI 3-6) after the first year.

There were 696 ischaemic strokes over 12,873 patient-years of follow up within the first year, and 417 symptomatic ischaemic strokes during 30,447 patient-years of follow up after the first year. In patients with CMBs the incidence of symptomatic ischaemic stroke within the first year was 70 (95% CI 62-80), and 18 (95% CI 15-21) after the first year. Accounting for death as a competing risk, we found no evidence for a change in risk over time associated with CMB presence for intracranial haemorrhage (subdistribution Hazard Ratio [SHR] 4.96, 95% CI 3.18-7.74 at day 0 vs. 4.81, 95% CI 3.15-7.35 after 1 year) or ischaemic stroke. (SHR 1.46, 95% CI 1.23-1.73 at day 0 vs. 1.49, 95% CI 1.27-1.75 after 1 year).

**Table 7. Baseline characteristics of patients according to whether they received treatment with antithrombotic drugs (antiplatelet drugs or oral anticoagulants) following ischaemic stroke or TIA.**

| Variable                                            | Antithrombotic drug treatment received<br>n=1065 | Antithrombotic drug treatment not received<br>n=19257 | p value |
|-----------------------------------------------------|--------------------------------------------------|-------------------------------------------------------|---------|
| Age mean (SD)                                       | 72 (14)                                          | 70 (13)                                               | <0.0001 |
| Sex (female), n (%)                                 | 489 (46)                                         | 8104/19257 (42)                                       | 0.0074  |
| Hypertension, n (%)                                 | 727/1051 (69)                                    | 13638/19220 (71)                                      | 0.215   |
| Previous ischaemic stroke, n (%)                    | 171/1044 (16)                                    | 2762/18156 (15)                                       | 0.101   |
| Previous intracranial haemorrhage, n (%)            | 45/742 (6%)                                      | 319/16480 (2)                                         | <0.0001 |
| Diabetes, n (%)                                     | 261/905 (27)                                     | 4240/17203 (25)                                       | 0.0930  |
| Regular anticoagulants prior to index stroke, n (%) | 105/829 (13)                                     | 1120/13338 (8)                                        | <0.0001 |
| Regular antiplatelets prior to index stroke, n (%)  | 221/826 (27)                                     | 4546/13318 (34)                                       | <0.0001 |
| Ischaemic heart disease, n (%)                      | 158/984 (16)                                     | 2450/17858 (14)                                       | 0.0387  |
| Stroke (vs. TIA) at study entry, n (%)              | 967/1064 (91)                                    | 15901/19247 (83)                                      | <0.0001 |
| Cerebral microbleed presence, n (%)                 | 306 (29)                                         | 5243 (28)                                             | 0.484   |
